# Supplementary material
Source: PubMed Central journal article supplement (PMC9064024)
Supplement: ehp10273.s001.acco.pdf [file ehp10273.s001.acco.pdf]

**Note to readers with disabilities:** *EHP* strives to ensure that all journal content is accessible to all readers. However, some figures and Supplemental Material published in *EHP* articles may not conform to [508 standards](#) due to the complexity of the information being presented. If you need assistance accessing journal content, please contact [ehp508@niehs.nih.gov](mailto:ehp508@niehs.nih.gov). Our staff will work with you to assess and meet your accessibility needs within 3 working days.

### **Supplemental Material**

#### **Screening of Organophosphate Flame Retardants with Placentation-Disrupting Effects in Human Trophoblast Organoid Model and Characterization of Adverse Pregnancy Outcomes in Mice**

Chenke Xu, Haojia Ma, Fumei Gao, Chenhao Zhang, Wenxin Hu, Yingting Jia, Jun Xu, and Jianying Hu

#### **Table of Contents**

**Figure S1. Induced and Characterized Trophoblast Organoids and Optimized Protocol.** (A) Human trophoblast organoid; (B) Immunofluorescence of villus markers KRT7 (green), GATA3 (red), and DAPI (blue) in trophoblast organoids following previous protocol (Sheridan, 2020); (C) Previous digestion (Sheridan, 2020) and optimized digestion (3 min in 37°C and pipetted gently); (D) Relative Ki67 intensity (means  $\pm$  SDs) of organoids after 2-day culture in previous digestion (Sheridan, 2020) and optimized digestion (3 min in 37°C and pipetted gently); (E) Relative Ki67 intensity (means  $\pm$  SDs) of organoids after 2-day culture in previous and optimized TOM (Table S5). Data in (C) and (D) are expressed relative to the levels of previous digestion and previous TOM, respectively, which were set to 1.  $n = 3$ . All organoids in (C) and (D) were from a single donor. Data were analyzed using an unpaired two-tailed Student's t-test. Indicated values are significantly different from control value.  $*p < 0.05$ . KRT7, keratin 7; GATA3, GATA binding protein 3; SD, standard deviation; TOM, trophoblast organoid medium. Scale bars, 60  $\mu\text{m}$ . Numeric data in (D)-(E) were listed in Table S16.

**Figure S2. Additional measures of short- and long-term toxicity of EHDPP in organoids.** (A) Relative fluorescence intensity (means  $\pm$  SDs) of Sytox Green (green) in trophoblast organoids in 2-day EHDPP exposure; (B) Relative fluorescence intensity (means  $\pm$  SDs) of Sytox Green (green) in trophoblast organoids in 10-day EHDPP exposure; (C) Western blotting of PD in control and 2-day EHDPP exposure groups; (D) Relative protein levels of PD (means  $\pm$  SDs) in western blotting in control and 2-day EHDPP exposure groups; (E) CD71 (green) and DAPI (grey) in control and 2-day EHDPP (10,000 nM) exposure groups; (F) Relative intensity (means  $\pm$  SDs) of CD71 in (E); (G) HLA-G (red), F-actin (blue) and DAPI (grey) in 4-day culture. Data in (A)-(G) are expressed relative to the levels of DMSO-treated organoids, which were set to 1.  $n = 3$ . All organoids in (A)-(G) were from a single donor. Analyzed by the unpaired two-tailed Student's t-test. Indicated values are significantly different from control value.  $*p < 0.05$ .  $**p < 0.01$ . Scale bars, 20  $\mu\text{m}$ . EHDPP, 2-ethylhexyl-diphenyl phosphate; PD, pyruvate dehydrogenase complex; CD71, transferrin receptor; HLA-G, human leucocyte antigen protein-G; DAPI, 4',6-diamidino-2-phenylindole; DMSO, dimethyl sulfoxide. Numeric data in (A), (B), (D) and (F) were listed in Table S16.

**Figure S3. Mechanism of placentation disruption.** (A) Relative expression (means  $\pm$  SDs) of IGF1 in 2-day EHDPP exposure; (B) Relative expression (means  $\pm$  SDs) of IGF2 exposure in 2-day EHDPP exposure; (C) Western blotting of IGF1R in HA-IGF1R and HA-GFP overexpression groups in 293T; (D) Relative intensity (means  $\pm$  SDs) of Ki67 in control and 2-day OSI-906 (50 nM) exposure groups; (E) Relative intensity (means  $\pm$  SDs) of TP63 in control and 2-day OSI-906 (50 nM) exposure groups; (F) CD71 (green) and DAPI (grey) in control and 2-day OSI-906 (50 nM) exposure groups; (G) Relative intensity (means  $\pm$  SDs) of CD71 in (F); (H) Relative intensity (means  $\pm$  SDs) of Ki67 in control and 10-day OSI-906 (50 nM) exposure groups; (I) Relative intensity (means  $\pm$  SDs) of TP63 in control and 10-day OSI-906 (50 nM) exposure groups; (J) Relative intensity (means  $\pm$  SDs) of CD71 in control and 10-day OSI-906 (50 nM) exposure groups; (K) Relative intensity (means  $\pm$  SDs) of HLA-G in control and 10-day OSI-906 (50 nM) exposure groups. Data in (A) and (B) and (D) and (E) and (G) and (K) are expressed relative to the levels of DMSO-treated organoids, which were set to 1.  $n = 3$ . All organoids in (A)-(K) were from one single donor. Analyzed by the unpaired two-tailed Student's t-test. Indicated values are significantly different from control value.  $*p < 0.05$ .  $**p < 0.01$ . Scale bars, 20  $\mu\text{m}$ . IGF1, insulin-like growth factor 1; IGF2, insulin-like growth factor 2; IGF1R, insulin-like growth factor 1 receptor; TP63, tumor protein 63; CD71, transferrin receptor; HLA-G, human leucocyte antigen protein-G; OSI-906, Linsitinib; DAPI, 4',6-diamidino-2-phenylindole; DMSO, dimethyl sulfoxide. Numeric data in (A), (B), (D), (E), (G), (H), (I), (J) and (K) were listed in Table S17.

**Figure S4. Effects of EHDPP on placental structure and pregnancy in female mice.** (A) HAND1 (red) and DAPI (blue) in E19.5 placentas in control and EHDPP (10 mg/kg/day) exposure group and scale bars in , 500  $\mu\text{m}$  in  $\times 2$  and 50  $\mu\text{m}$  in  $\times 40$ .; (B) Relative intensity (means  $\pm$  SDs) of TPBPA; (C) Relative intensity (means  $\pm$  SDs) of TFAP2C; (D) Relative intensity (means  $\pm$  SDs) of HAND1 (B)-(D) were detected in control and EHDPP (10 mg/kg/day) exposure groups in E19.5 placentas; (E) Relative protein level (means  $\pm$  SDs) of p-IGF1R (Y1135)/IGF1R in E19.5 fetal placentas; (F) p-IGF1R (green) in control and EHDPP exposure groups in E19.5 placentas; (G) Relative protein level (means  $\pm$  SDs) of PD in western blotting in control and EHDPP exposure groups in E19.5 placentas; (H) Relative protein level (means  $\pm$  SDs) of cytochrome C in western blotting in control and EHDPP exposure groups in E19.5 placentas; (I) GSEA analysis between placentas of Control and 10 mg/kg EHDPP exposure group in E19.5 placentas; (J) FGR incidence rates after EHDPP exposure. Data in (B) and (C) and (D) and (E) and (G) and (H) are expressed relative to the levels of control group, which were set to 1. (B)-(E),  $n = 5$ ; (G)-(I),  $n = 3$ ; (J),  $n = 10$ . (B) and (C) and (D) and (E) and (G) and (H) was analyzed by the unpaired two-tailed Student's t-test. (J) was analyzed by  $\chi^2$  test. Indicated values are significantly different from control value. \* $p < 0.05$  and \*\* $p < 0.01$ . (A): Scale bars, 500  $\mu\text{m}$  in  $\times 2$  and 50  $\mu\text{m}$  in  $\times 40$ . HAND1, crest derivatives-expressed protein 1; TPBPA, trophoblast-specific protein  $\alpha$ ; TFAP2C, transcription factor AP-2  $\gamma$ ; IGF1R, insulin-like growth factor 1 receptor; p-IGF1R, phosphorylated-IGF1R; EHDPP, 2-ethylhexyl-diphenyl phosphate; PD, pyruvate dehydrogenase complex; FGR, fetal growth restriction;  $\chi^2$ , chi-square. Numeric data in (B), (C), (D), (E), (G) and (H) were listed in Table S17.

**Table S1.** OPFRs list for screening.

**Table S2.** Geographical information of exposure in 16 OPFRs.

**Table S3.** Chemicals used in this paper.

**Table S4.** Information of donors.

**Table S5.** Trophoblast organoid medium (TOM).

**Table S6.** Primer sequences in RT-qPCR.

**Table S7.** Antibodies and DAPI.

**Table S8.** Screening of OPFRs.

**Table S9.** Numeric data for Fig 3B, 3D, 3E, 3G, 3I, 3K, 3L, 3M, 3O, 3P (means  $\pm$  SDs).

**Table S10.** Numeric data for Fig 3C (oxygen consumption rate; pmol/min).

**Table S11.** Numeric data for Fig 3Q (means  $\pm$  SDs).

**Table S12.** Numeric data for Fig 4C, 4D, 4E.

**Table S13.** Numeric data for Fig 4F (% inhibition).

**Table S14.** Numeric data for Fig 5D, 5E, 5J, 5L, 5M.

**Table S15.** Numeric data for Fig 5K (means  $\pm$  SDs).

**Table S16.** Numeric data for Fig S1D, S1E, S2A, S2B, S2F (means  $\pm$  SDs), and S2D.

**Table S17.** Numeric data for Fig S3A, S3B, S3D, S3E, S3G, S3H, S3I, S3J, S3K (mean  $\pm$  SDs).

**Table S18.** Numeric data for Fig S4B, S4C, S4D, S4E, S4G, S4H.

### **Sequence of HA-GFP**

### **References**

**Additional File-** Excel Document

## Supplementary Text

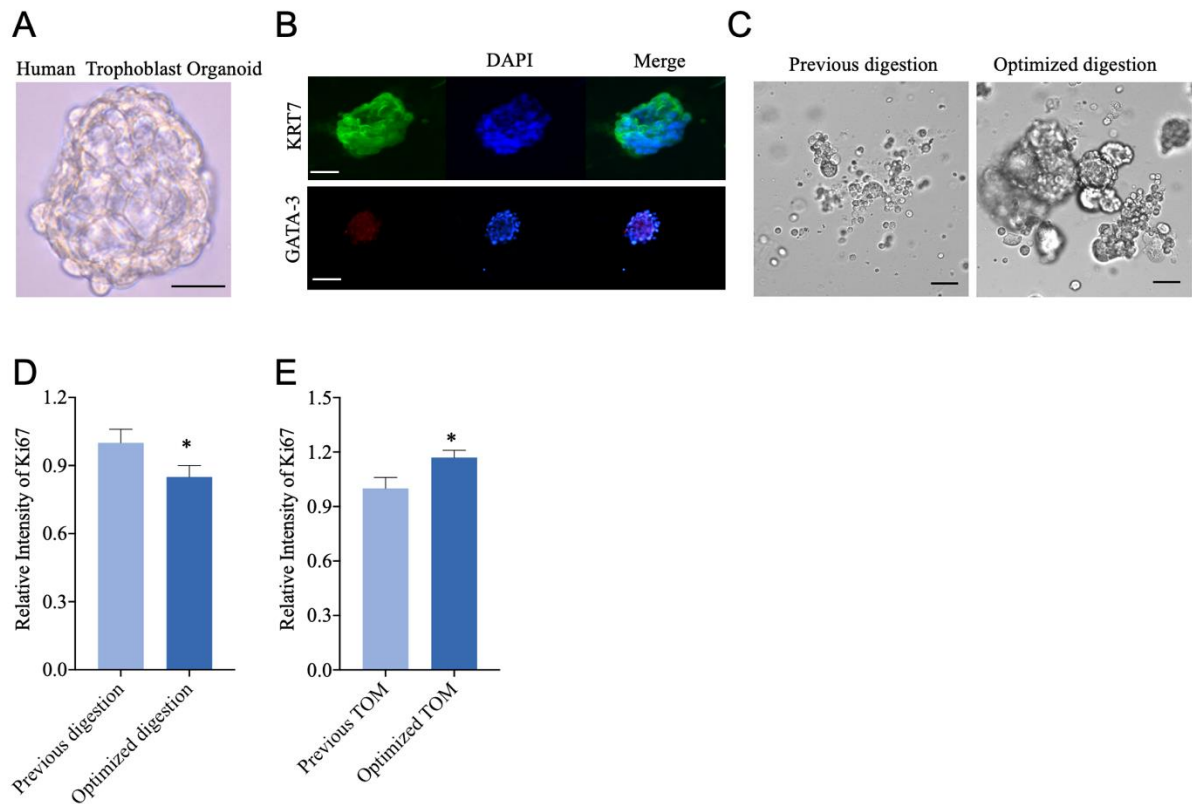

**Figure S1. Induced and Characterized Trophoblast Organoids and Optimized Protocol.** (A) Human trophoblast organoid; (B) Immunofluorescence of villus markers KRT7 (green), GATA3 (red), and DAPI (blue) in trophoblast organoids following previous protocol (Sheridan, 2020); (C) Previous digestion (Sheridan, 2020) and optimized digestion (3 min in 37°C and pipetted gently); (D) Relative Ki67 intensity (means  $\pm$  SDs) of organoids after 2-day culture in previous digestion (Sheridan, 2020) and optimized digestion (3 min in 37°C and pipetted gently); (E) Relative Ki67 intensity (means  $\pm$  SDs) of organoids after 2-day culture in previous and optimized TOM (Table S5). Data in (C) and (D) are expressed relative to the levels of previous digestion and previous TOM, respectively, which were set to 1.  $n = 3$ . All organoids in (C) and (D) were from a single donor. Data were analyzed using an unpaired two-tailed Student's t-test. Indicated values are significantly different from control value. \* $p < 0.05$ . KRT7, keratin 7; GATA3, GATA binding protein 3; SD, standard deviation; TOM, trophoblast organoid medium. Scale bars, 60  $\mu$ m. Numeric data in (D)-(E) were listed in Table S16.

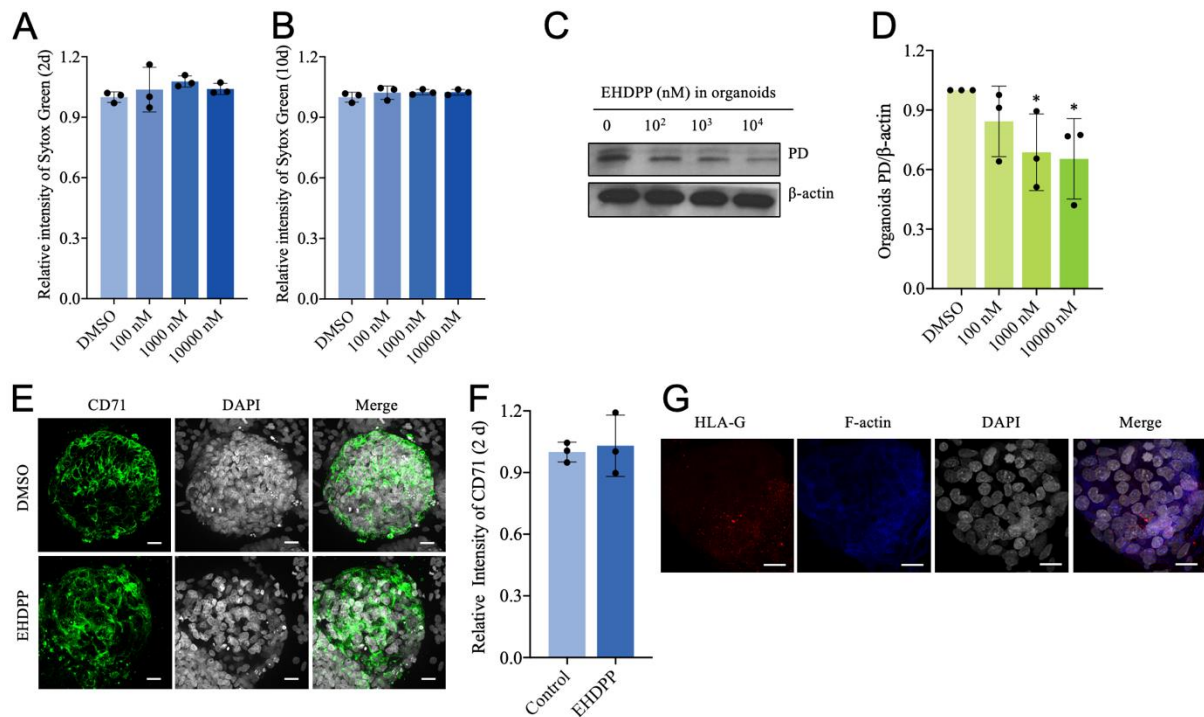

**Figure S2. Additional measures of short- and long-term toxicity of EHDPP in organoids.** (A) Relative fluorescence intensity (means  $\pm$  SDs) of Sytox Green (green) in trophoblast organoids in 2-day EHDPP exposure; (B) Relative fluorescence intensity (means  $\pm$  SDs) of Sytox Green (green) in trophoblast organoids in 10-day EHDPP exposure; (C) Western blotting of PD in control and 2-day EHDPP exposure groups; (D) Relative protein levels of PD (means  $\pm$  SDs) in western blotting in control and 2-day EHDPP exposure groups; (E) CD71 (green) and DAPI (grey) in control and 2-day EHDPP (10,000 nM) exposure groups; (F) Relative intensity (means  $\pm$  SDs) of CD71 in (E); (G) HLA-G (red), F-actin (blue) and DAPI (grey) in 4-day culture. Data in (A)-(G) are expressed relative to the levels of DMSO-treated organoids, which were set to 1.  $n = 3$ . All organoids in (A)-(G) were from a single donor. Analyzed by the unpaired two-tailed Student's t-test. Indicated values are significantly different from control value. \* $p < 0.05$ . \*\* $p < 0.01$ . Scale bars, 20  $\mu$ m. EHDPP, 2-ethylhexyl-diphenyl phosphate; PD, pyruvate dehydrogenase complex; CD71, transferrin receptor; HLA-G, human leucocyte antigen protein-G; DAPI, 4',6-diamidino-2-phenylindole; DMSO, dimethyl sulfoxide. Numeric data in (A), (B), (D) and (F) were listed in Table S16.

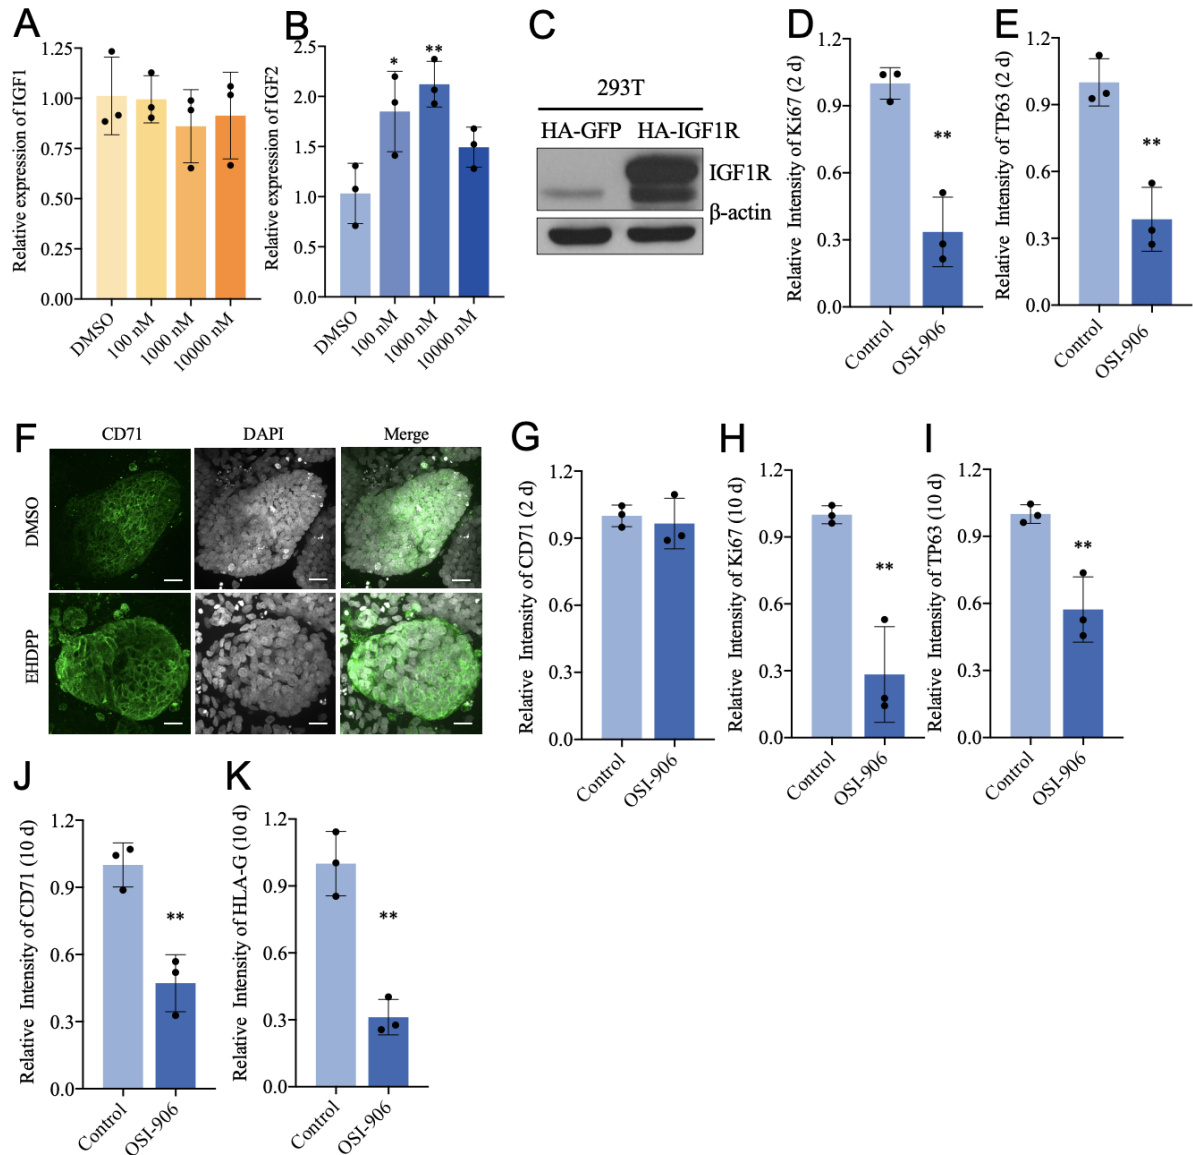

**Figure S3. Mechanism of placentation disruption.** (A) Relative expression (means  $\pm$  SDs) of IGF1 in 2-day EHDPP exposure; (B) Relative expression (means  $\pm$  SDs) of IGF2 exposure in 2-day EHDPP exposure; (C) Western blotting of IGF1R in HA-IGF1R and HA-GFP overexpression groups in 293T; (D) Relative intensity (means  $\pm$  SDs) of Ki67 in control and 2-day OSI-906 (50 nM) exposure groups; (E) Relative intensity (means  $\pm$  SDs) of TP63 in control and 2-day OSI-906 (50 nM) exposure groups; (F) CD71 (green) and DAPI (grey) in control and 2-day OSI-906 (50 nM) exposure groups; (G) Relative intensity (means  $\pm$  SDs) of CD71 in (F); (H) Relative intensity (means  $\pm$  SDs) of Ki67 in control and 10-day OSI-906 (50 nM) exposure groups; (I) Relative intensity (means  $\pm$  SDs) of TP63 in control and 10-day OSI-906 (50 nM) exposure groups; (J) Relative intensity (means  $\pm$  SDs) of CD71 in control and 10-day OSI-906 (50 nM) exposure groups; (K) Relative intensity (means  $\pm$  SDs) of HLA-G in control and 10-day OSI-906 (50 nM) exposure groups. Data in (A) and (B) and (D) and (E) and (G) and (K) are expressed relative to the levels of DMSO-treated organoids, which were set to 1.  $n = 3$ . All organoids in (A)-(K) were from one single donor. Analyzed by the unpaired two-tailed Student's t-test. Indicated values are significantly different from control value.  $*p < 0.05$ .  $**p < 0.01$ . Scale bars, 20  $\mu\text{m}$ . IGF1, insulin-like growth factor 1; IGF2, insulin-like growth factor

2; IGF1R, insulin-like growth factor 1 receptor; TP63, tumor protein 63; CD71, transferrin receptor; HLA-G, human leucocyte antigen protein-G; OSI-906, Linsitinib; DAPI, 4',6-diamidino-2-phenylindole; DMSO, dimethyl sulfoxide. Numeric data in (A), (B), (D), (E), (G), (H), (I), (J) and (K) were listed in Table S17.



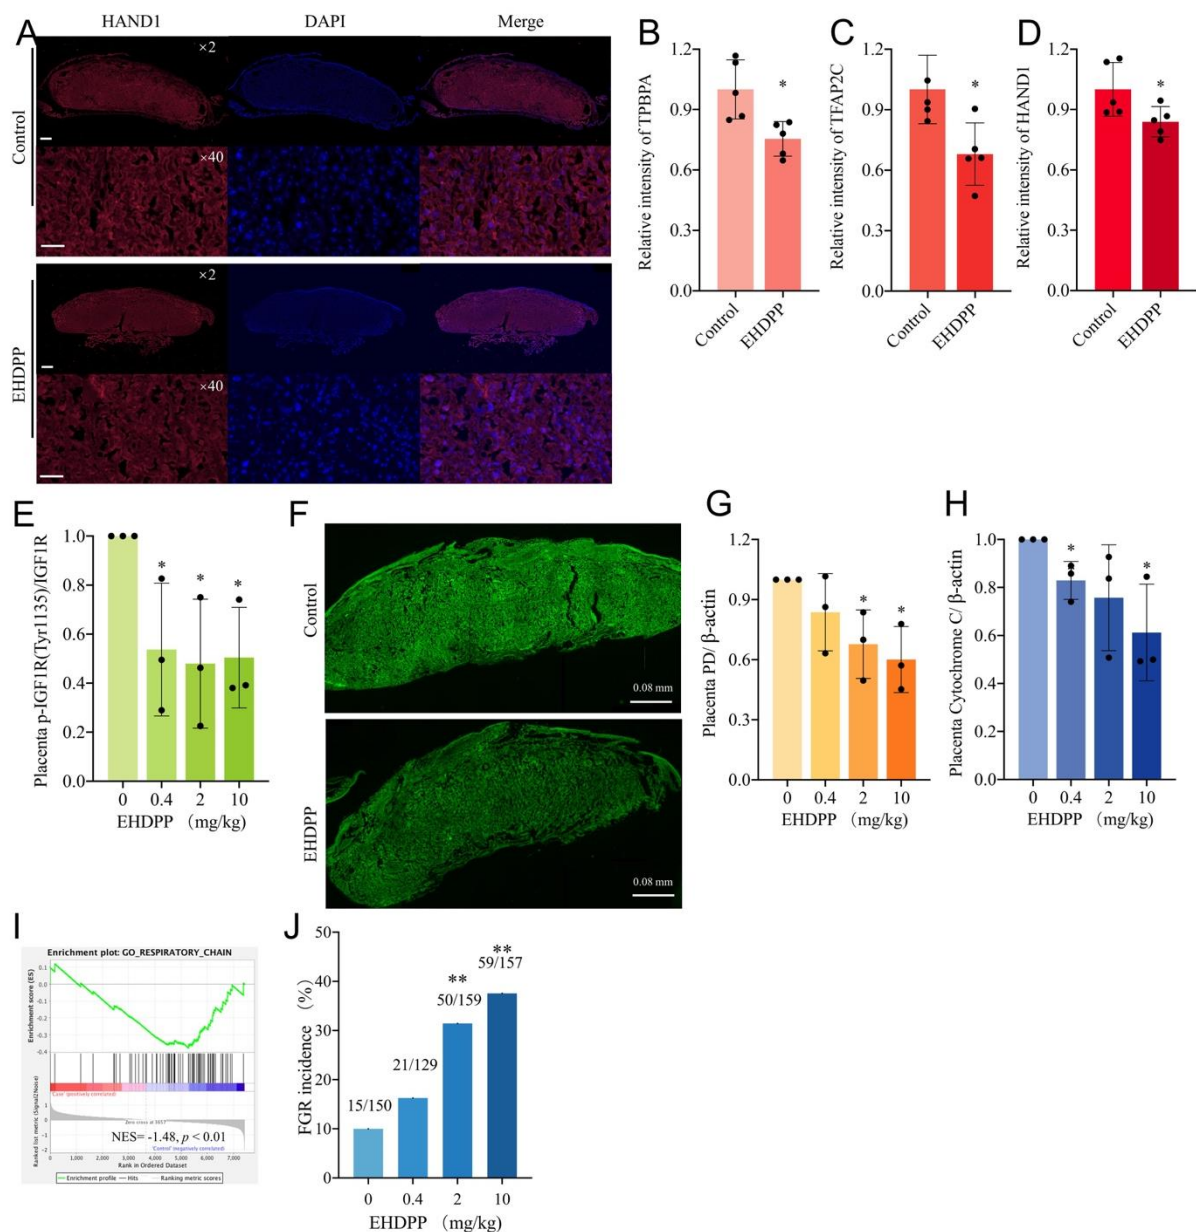

**Figure S4. Effects of EHDPP on placental structure and pregnancy in female mice.** (A) HAND1 (red) and DAPI (blue) in E19.5 placentas in control and EHDPP (10 mg/kg/day) exposure group and scale bars in , 500  $\mu$ m in  $\times 2$  and 50  $\mu$ m in  $\times 40$ .; (B) Relative intensity (means  $\pm$  SDs) of TPBPA; (C) Relative intensity (means  $\pm$  SDs) of TFAP2C; (D) Relative intensity (means  $\pm$  SDs) of HAND1 (B)- (D) were detected in control and EHDPP (10 mg/kg/day) exposure groups in E19.5 placentas; (E) Relative protein level (means  $\pm$  SDs) of p-IGF1R (Y1135)/IGF1R in E19.5 fetal placentas; (F) p-IGF1R (green) in control and EHDPP exposure groups in E19.5 placentas; (G) Relative protein level (means  $\pm$  SDs) of PD in western blotting in control and EHDPP exposure groups in E19.5 placentas; (H) Relative protein level (means  $\pm$  SDs) of cytochrome C in western blotting in control and EHDPP exposure groups in E19.5 placentas; (I) GSEA analysis between placentas of Control and 10 mg/kg EHDPP exposure group in E19.5 placentas; (J) FGR incidence rates after EHDPP exposure. Data in (B) and (C) and (D) and (E) and (G) and (H) are expressed relative to the levels of control group,

which were set to 1. (B)-(E),  $n = 5$ ; (G)-(I),  $n = 3$ ; (J),  $n = 10$ . (B) and (C) and (D) and (E) and (G) and (H) was analyzed by the unpaired two-tailed Student's t-test. (J) was analyzed by  $\chi^2$  test. Indicated values are significantly different from control value.  $*p < 0.05$  and  $**p < 0.01$ . (A): Scale bars, 500  $\mu\text{m}$  in  $\times 2$  and 50  $\mu\text{m}$  in  $\times 40$ . HAND1, crest derivatives-expressed protein 1; TPBPA, trophoblast-specific protein  $\alpha$ ; TFAP2C, transcription factor AP-2  $\gamma$ ; IGF1R, insulin-like growth factor 1 receptor; p-IGF1R, phosphorylated-IGF1R; EHDPP, 2-ethylhexyl-diphenyl phosphate; PD, pyruvate dehydrogenase complex; FGR, fetal growth restriction;  $\chi^2$ , chi-square. Numeric data in (B), (C), (D), (E), (G) and (H) were listed in Table S17.

**Table S1. OPFRs list for screening**

| Classification | Full name (Abbreviation)                                              | CAS        | Company                 |
|----------------|-----------------------------------------------------------------------|------------|-------------------------|
| Alkyl-OPFRs    | Triethyl phosphate (TEP)                                              | 78-40-0    | TCI Corp., P0270        |
|                | Triisopropyl phosphate (TiPP)                                         | 513-02-0   | Sigma, 554669           |
|                | Tributyl phosphate (TBP)                                              | 126-73-8   | Sigma, 8186040100       |
|                | Tripropyl phosphate (TPrP)                                            | 513-08-6   | Macklin, T819409        |
|                | Triisobutyl phosphate (TiBP)                                          | 126-71-6   | Macklin, T834115        |
|                | Tris(2-ethylhexyl) phosphate (TEHP)                                   | 78-42-2    | TCI Corp., P1022        |
|                | Dimethyl hydrogen phosphate (DMP)                                     | 813-78-5   | Macklin, D885090        |
|                | Diethyl hydrogen phosphate (DEP)                                      | 598-02-7   | Macklin, D839196        |
|                | Dibutyl phosphate (DBP) *(He et al. 2021)                             | 107-66-4   | Macklin, D835976        |
|                | Bis(2-ethylhexyl) hydrogen phosphate (BEHP) *(Huo et al. 2020)        | 298-07-7   | Macklin, B802752        |
|                | Trihexyl phosphate (T6CP) *(Wang, 2020)                               | 2528-39-4  | Macklin, T908781        |
| Aryl-OPFRs     | Isopropylphenyl Phenyl Phosphate (ip-PPP)                             | 68782-95-6 | Macklin, I860749        |
|                | 2-Ethylhexyl diphenyl phosphate (EHDPP)                               | 1241-94-7  | TCI Corp., P1021        |
|                | Isodecyl diphenyl phosphate (IDDPP)                                   | 29761-21-5 | AccuStandard, PFRS-008S |
|                | Triphenyl phosphate (TPhP)                                            | 115-86-6   | TCI Corp., P0272        |
|                | Tris(3,5-xilylenyl) phosphate (TXP)                                   | 25155-23-1 | Synthesized             |
|                | Tris(4-tert-butylphenyl) phosphate (T4tBPPP)                          | 78-33-1    | Synthesized             |
|                | Tricresyl phosphate (TCrP)                                            | 1330-78-5  | Macklin, T819410        |
|                | Diisodecyl phenyl phosphate (DIDPP)                                   | 51363-64-5 | Synthesized             |
|                | Tri-O-cresyl phosphate (o-TCrP)                                       | 78-30-8    | Macklin, T820120        |
|                | Tricresyl phosphate (p-TCrP)                                          | 78-32-0    | Macklin, T862850        |
|                | Tri-M-cresyl phosphate (m-TCrP)                                       | 563-04-2   | Macklin, T867695        |
|                | Tris(4-isopropylphenyl) phosphate (T4IPPP)                            | 2502-15-0  | Wellington Laboratories |
|                | Bis(p-tert-butylphenyl) phenyl phosphate (B4tBPPP)                    | 115-87-7   | Wellington Laboratories |
|                | Resorcinol bis(diphenyl phosphate) (RDP)                              | 57583-54-7 | Macklin, R860747        |
|                | Cresyl diphenyl phosphate (CDP)                                       | 26444-49-5 | Macklin, C8341114       |
|                | Diphenyl phosphate (DPP) *(Funk et al. 2019)                          | 838-85-7   | Macklin, D831185        |
|                | Tris(nonylphenyl) phosphate (TNPP) *(Wang et al. 2020)                | 26569-53-9 | Synthesized             |
|                | Isopropylphenyl diphenyl phosphate (2IPPDPP) *(Wang et al. 2020)      | 64532-94-1 | Wellington Laboratories |
|                | Bis(2-isopropylphenyl) phenyl phosphate (B2IPPPP) *(Wang et al. 2020) | 69500-29-4 | Wellington Laboratories |
|                | 4-tert-butylphenyl diphenyl phosphate (4tBPDPP) *(Wang et al. 2020)   | 981-40-8   | Wellington Laboratories |
|                | Bis(2-ethylhexyl) phenyl phosphate (BEHPP) *(Wang et al. 2020)        | 16368-97-1 | Macklin, B905605        |
|                | Bisphenol A bis(diphenyl phosphate) (BPADP) *(Wang et al. 2020)       | 5945-33-5  | Aladdin, B304092        |
|                | Tris(2,4-ditert-butylphenyl) phosphate (T4DtBPP) *(Wang et al. 2020)  | 95906-11-9 | Wellington Laboratories |
|                | Bis(2-methylphenyl) hydrogen phosphate (DoCP) *(Gao, 2020)            | 35787-74-7 | TRC, D494575            |

Most of OPFRs were picked from Toxicity Forecaster (Toxcast) list (<https://comptox.epa.gov/dashboard/chemical-lists/FLAMERETARD>). \* Chemicals that are not on the Toxicity Forecaster (Toxcast)

### Continued

| Classification                                       | Full name (Abbreviation)                                                                                          | CAS                  | Company                |
|------------------------------------------------------|-------------------------------------------------------------------------------------------------------------------|----------------------|------------------------|
| Halogenated-OPFRs                                    | Tris(1,3-dichloro-2-propyl)phosphate (TDCIPP)                                                                     | 13674-87-8           | TCI Corp., P0269       |
|                                                      | Tris(2-chloroethyl) phosphate (TCEP)                                                                              | 115-96-8             | Sigma-Aldrich, 119660  |
|                                                      | tert-Butylphenyl diphenyl phosphate (BPDPP)                                                                       | 56803-37-3           | Johnlong, CFRT111308   |
|                                                      | Bis(2,3-dibromopropyl) hydrogen phosphate (BDBPP)                                                                 | 5412-25-9            | Bioruler, RH132419     |
|                                                      | Tris(1-chloro-2-propyl) phosphate (TCIPP)                                                                         | 13674-84-5           | Rowan, R010190         |
|                                                      | 2,2-Bis-(bromomethyl)-3-bromo-1-propanol phosphate (TTBNPP)                                                       | 19186-97-1           | Macklin, T859201       |
|                                                      | Tris(2,3-dibromopropyl) phosphate (TDBPP)                                                                         | 126-72-7             | AccuStandard, PFS-008N |
|                                                      | Oxydi-2,1-Ethanediyl-Phosphoric Acid Tetrakis(2-Chloro-1-Methylethyl) Ester (RDT905)* (Wang et al. 2021)          | 52186-00-2           | Omnistab, FR-RDT 9     |
|                                                      | Phosphoric acid, 2,2-bis(chloromethyl)-1,3-propanediyl tetrakis(2-chloroethyl) ester (V6)* (Wang et al. 2021)     | 38051-10-4           | AccuStandard, PFS-020S |
|                                                      | 3,9-Bis(2,4-di-tert-butylphenoxy)-2,4,8,10-tetraoxa-3,9-diphosphaspiro[5.5]undecane (AO626=O2)*(Wang et al. 2021) | 26741-53-7           | Macklin, A832583       |
| Bis(2-chloroethyl) phosphate (BCEP)*(He et al. 2021) | 3040-56-0                                                                                                         | Johnlong, CCHM701085 |                        |

Most of OPFRs were picked from Toxicity Forecaster (Toxcast) list (<https://comptox.epa.gov/dashboard/chemical-lists/FLAMERETARD>). \* Chemicals that are not on the Toxicity Forecaster (Toxcast)

**Table S2.** Geographical information of exposure in 16 OPFRs

| Abbreviation | Geographical information | Reference                                                 |
|--------------|--------------------------|-----------------------------------------------------------|
| DBP          | the USA                  | (He et al. 2021)                                          |
| BEHP         | China                    | (Huo et al. 2020)                                         |
| T6CP         | China                    | (Gao et al. 2020)                                         |
| DPP          | China; the USA; Canada   | (Gao et al. 2020; Carignan et al. 2017; Funk et al. 2019) |
| TNPP         | Canada; China            | (Liu et al. 2019; Wang et al. 2020)                       |
| 2IPDP        | China                    | (Wang et al. 2020)                                        |
| B2IPPPP      | China                    | (Wang et al. 2020)                                        |
| 4tBPDPP      | China                    | (Wang et al. 2020)                                        |
| BEHPP        | China                    | (Wang et al. 2020)                                        |
| BPADP        | China                    | (Wang et al. 2020)                                        |
| T4DtBPP      | China                    | (Wang et al. 2020)                                        |
| DoCP         | China                    | (Gao et al. 2020)                                         |
| RDT905       | China                    | (Wang et al. 2021)                                        |
| V6           | China; the USA           | (Wang et al. 2021, Stapleton et al. 2011)                 |
| AO626=O2     | China                    | (Wang et al. 2021)                                        |
| BCEP         | the USA                  | (He et al. 2021)                                          |

Note: For definition of abbreviations, see Table S1.

**Table S3.** Chemicals used in this paper

| Chemicals            | Company           | Final concentration |
|----------------------|-------------------|---------------------|
| OSI-906 (Linsitinib) | MCE, HY-10191     | 50 nM               |
| Testosterone         | NOVUS, NBP2-45187 | 40 $\mu$ M          |

**Table S4.** Information of donors

| Donor Number | Age | Gestational age | Karyotype |
|--------------|-----|-----------------|-----------|
| 1#           | 24  | 7 weeks         | 44+XX     |
| 2#           | 28  | 8 weeks         | 44+XY     |
| 3#           | 30  | 7 weeks         | 44+XX     |
| 4#           | 39  | 7 weeks         | 44+XY     |
| 5#           | 28  | 8 weeks         | 44+XY     |

**Table S5.** Trophoblast organoid medium (TOM)

| Product                          | Company and Product Number  | Optimized (Previous) concentration |
|----------------------------------|-----------------------------|------------------------------------|
| Advanced DMEM/F12                | Life Technologies, 12634010 | 1X                                 |
| N2 supplement                    | Life Technologies, 17502048 | 1X                                 |
| B27 supplement                   | Life Technologies, 12587010 | 1X                                 |
| L-glutamine                      | Life Technologies, 25030    | 2 mM                               |
| N-acetyl-L-cysteine              | Sigma, A9165                | 1.25 mM                            |
| ALK-4, -5, -7 inhibitor, A83-0.1 | Tocris, 2939                | 500 nM                             |
| CHIR99021                        | Tocris, 4423                | 5 $\mu$ M (1.5 $\mu$ M)            |
| Recombinant human EGF            | Peprtech, AF-100-15         | 50 ng/mL                           |
| Recombinant human R-spondin 1    | BioTechne, 4645-RS          | 80 ng/mL                           |
| Recombinant human FGF2           | Peprtech, 100-18C           | 100 ng/mL                          |
| Recombinant human HGF            | Peprtech, 100-39            | 50 ng/mL                           |
| Y27632                           | Tocris, 1254                | 10 $\mu$ M (2 $\mu$ M)             |
| PGE2                             | Sigma, P0409                | 10 $\mu$ M (2.5 $\mu$ M)           |
| Penicillin Streptomycin          | Gibco, 15140122             | 100X                               |

**Table S6.** Primer sequences in RT-qPCR

| Primer                                | Forward               | Reverse                |
|---------------------------------------|-----------------------|------------------------|
| <i>Human IGF1</i>                     | GCTCTTCAGTTCGTGTGTGGA | GCCTCCTTAGATCACAGCTCC  |
| <i>Human IGF2</i>                     | GTGGCATCGTTGAGGAGTG   | CACGTCCCTCTCGGACTTG    |
| <i>Human IGF1R</i>                    | TCGACATCCGCAACGACTATC | CCAGGGCGTAGTTGTAGAAGAG |
| <i>Human <math>\beta</math>-actin</i> | CATGTACGTTGCTATCCAGGC | CTCCTTAATGTCACGCACGAT  |

**Table S7. Antibodies and DAPI**

| Antibody                                   | Company          | Product number | Dilution    |
|--------------------------------------------|------------------|----------------|-------------|
| anti-Ki67                                  | CST              | 12075S         | 1:100 (IF)  |
| anti-HLA-G                                 | Abcam            | ab52454        | 1:100 (IF)  |
| anti-p63                                   | Abcam            | ab124762       | 1:100 (IF)  |
| anti-CD71                                  | Abcam            | ab38171        | 1:100 (IF)  |
| anti-Cdx2                                  | Abcam            | ab576541       | 1:50 (IF)   |
| anti-rabbit IgG H&L                        | Abcam            | ab150075       | 1:100 (IF)  |
| anti-mouse IgG H&L                         | CST              | 8890S          | 1:100 (IF)  |
| anti-trophoblast specific protein $\alpha$ | Abcam            | ab104401       | 1:30 (IF)   |
| anti-HAND1                                 | Bioss            | bs-9459R       | 1:30 (IF)   |
| anti-transcription factor AP-2 $\gamma$    | Santa Cruz       | sc-8977        | 1:30 (IF)   |
| DAPI                                       | SIGMA            | D9542          | 1:5000 (IF) |
| Alexa fluor 488 Phallo                     | Molecular Probes | A12379         | 1:200 (IF)  |
| anti-pyruvate dehydrogenase                | CST              | 3250S          | 1:1000 (WB) |
| anti-cytochrome c                          | CST              | 4280S          | 1:1000 (WB) |
| anti- $\beta$ -Actin                       | CST              | 3700S          | 1:2000 (WB) |
| anti-mouse IgG HRP-linked                  | CST              | 7076S          | 1:5000 (WB) |
| anti-rabbit IgG HRP-linked                 | CST              | 14708S         | 1:1000 (WB) |
| anti-phospho-Akt (Ser <sub>473</sub> )     | CST              | 4060S          | 1:1000 (WB) |
| anti-Akt (pan)                             | CST              | 7076S          | 1:5000 (WB) |
| anti-phospho-IGF1R $\beta$ (Tyr1135)       | CST              | 3918S          | 1:1000 (WB) |
| anti-IGF1R $\beta$                         | CST              | 9750S          | 1:1000 (WB) |
| anti-KRT7                                  | CST              | 4465S          | 1:50 (IF)   |
| anti-GATA3                                 | Abcam            | ab100428       | 1:50 (IF)   |

\* IF, immunofluorescence; WB, western blotting.

**Table S8.** Screening of OPFRs

| Chemicals | Average<br>Intensity of Ki67 | Average<br>Intensity of Sytox Green |
|-----------|------------------------------|-------------------------------------|
| DMSO      | 7,832.3 ± 896.1              | 2,336.7 ± 29.1                      |
| TEP       | 7,129.2 ± 1,478.2            | 2,381.1 ± 127.4                     |
| TiPP      | 8,214.9 ± 1,151.1            | 2,280.8 ± 72.5                      |
| TBP       | 7,168.4 ± 1,726.7            | 2,383.9 ± 20.6                      |
| TPrP      | 7,560.9 ± 392.4              | 2,422.3 ± 131.7                     |
| TiBP      | 7,168.4 ± 889.5              | 2,348.1 ± 38.6                      |
| TEHP      | 7,390.8 ± 13.1               | 2,312.1 ± 35.0                      |
| DMP       | 8,057.9 ± 1268.9             | 2,339.5 ± 65.7                      |
| DEP       | 7,822.5 ± 1046.5             | 2,265.2 ± 25.1                      |
| DBP       | 7,220.8 ± 758.7              | 2,316.5 ± 31.9                      |
| BEHP      | 7,142.3 ± 444.8              | 2,384.7 ± 27.3                      |
| T6CP      | 7,338.5 ± 1517.4             | 2,342.0 ± 56.2                      |
| ip-PPP    | 6,370.5 ± 130.8              | 2,431.7 ± 13.0                      |
| EHDPP     | 5,598.7 ± 601.7              | 2,622.7 ± 159.5                     |
| IDDPP     | 5,808.0 ± 1,216.5            | 2,568.9 ± 2.0                       |
| TPhP      | 7,966.4 ± 366.3              | 2,506.6 ± 56.3                      |
| TXP       | 6,906.8 ± 797.9              | 2,526.0 ± 35.4                      |
| T4tBPPP   | 7,534.7 ± 745.6              | 2,590.1 ± 240.0                     |
| TCrP      | 7,403.9 ± 222.4              | 2,557.9 ± 45.0                      |
| DIDPP     | 6,148.1 ± 954.9              | 2,407.0 ± 92.2                      |
| o-TCrP    | 5,232.4 ± 811.0              | 2,391.9 ± 102.7                     |
| p-TCrP    | 8,633.5 ± 366.3              | 2,409.9 ± 89.7                      |
| m-TCrP    | 6,645.2 ± 994.2              | 2,388.4 ± 93.6                      |
| T4IPPP    | 6,434.3 ± 497.1              | 2,469.0 ± 131.1                     |
| B4tBPPP   | 5,546.4 ± 484.0              | 2,534.9 ± 58.0                      |
| RDP       | 9222.2 ± 457.8               | 2,303.1 ± 18.6                      |
| CDP       | 6,370.5 ± 143.9              | 2,422.5 ± 76.8                      |
| DPP       | 7,521.6 ± 706.4              | 2,403.1 ± 137.2                     |
| TNPP      | 11,092.8 ± 1,420.7           | 2,302.5 ± 41.2                      |

*Continued*

| Chemicals | Average Intensity of Ki67 (AU) | Average Intensity of Sytox Green (AU) |
|-----------|--------------------------------|---------------------------------------|
| 2IPDPP    | 7,168.4 ± 1,530.5              | 2,299.6 ± 64.5                        |
| B2IPPPP   | 6,684.4 ± 26.2                 | 2,612.4 ± 26.0                        |
| 4tBPDPP   | 7,430.1 ± 2,106.1              | 2,115.2 ± 230.8                       |
| BEHPP     | 7,050.7 ± 797.9                | 2,334.5 ± 115.3                       |
| BPADP     | 7,142.3 ± 1,151.1              | 2,365.4 ± 92.7                        |
| T4DtBPP   | 6,815.2 ± 706.4                | 2,524.9 ± 63.0                        |
| DoCP      | 7,273.1 ± 876.4                | 2,362.6 ± 39.6                        |
| TDCIPP    | 7,757.1 ± 1,203.5              | 2,401.5 ± 31.4                        |
| TCEP      | 8,829.7 ± 706.4                | 2,289.7 ± 41.4                        |
| BPDPP     | 8,254.2 ± 1,412.8              | 2,361.0 ± 115.7                       |
| BDBPP     | 7,076.9 ± 1,177.3              | 2,384.2 ± 73.9                        |
| TCIPP     | 6,933.0 ± 811.0                | 2,354.0 ± 60.4                        |
| TTBNPP    | 6,370.5 ± 196.2                | 2,461.6 ± 84.5                        |
| TDBPP     | 7,377.7 ± 2,145.3              | 2,511.9 ± 86.0                        |
| RDT905    | 7,678.6 ± 627.9                | 2,487.8 ± 73.5                        |
| V6        | 6,854.5 ± 340.1                | 2,566.0 ± 41.3                        |
| AO626=O2  | 8,097.2 ± 1,151.1              | 2,543.0 ± 113.4                       |
| BCEP      | 7,704.8 ± 1,007.2              | 2,424.8 ± 271.4                       |

**Note:** numerical data for Figure 2C, D (means ± SDs); AU, arbitrary units.



**Table S9.** Numeric data for Fig 3B, 3D, 3E, 3G, 3I, 3K, 3L, 3M, 3O, 3P (means  $\pm$  SDs)

| Experiment                            | Dose            | Numeric data           |
|---------------------------------------|-----------------|------------------------|
| Average intensity of Ki67 (2 d; AU)   | DMSO            | 187.3 $\pm$ 15.0       |
|                                       | 100 nM EHDPP    | 166.7 $\pm$ 18.7       |
|                                       | 1,000 nM EHDPP  | 148.0 $\pm$ 18.7       |
|                                       | 10,000 nM EHDPP | 89.9 $\pm$ 24.3        |
| Basic Metabolism (pmol/min)           | DMSO            | 3,018.1 $\pm$ 740.3    |
|                                       | 100 nM EHDPP    | 2,042.5 $\pm$ 560.4    |
|                                       | 1,000 nM EHDPP  | 1,344.5 $\pm$ 380.9    |
|                                       | 10,000 nM EHDPP | 1,269.1 $\pm$ 252.0    |
| Respiratory Capacity (pmol/min)       | DMSO            | 3,012.2 $\pm$ 477.8    |
|                                       | 100 nM EHDPP    | 2,383.6 $\pm$ 790.2    |
|                                       | 1,000 nM EHDPP  | 1,643.9 $\pm$ 655.9    |
|                                       | 10,000 nM EHDPP | 1,528.9 $\pm$ 383.4    |
| Average intensity of TP63 (2 d; AU)   | DMSO            | 103.3 $\pm$ 16.5       |
|                                       | 100 nM EHDPP    | 90.9 $\pm$ 13.4        |
|                                       | 1,000 nM EHDPP  | 67.1 $\pm$ 12.4        |
|                                       | 10,000 nM EHDPP | 59.9 $\pm$ 18.6        |
| Average intensity of Ki67 (10 d; AU)  | DMSO            | 172.9 $\pm$ 8.6        |
|                                       | 100 nM EHDPP    | 164.3 $\pm$ 1.7        |
|                                       | 1,000 nM EHDPP  | 138.3 $\pm$ 19.0       |
|                                       | 10,000 nM EHDPP | 115.9 $\pm$ 20.8       |
| Average intensity of TP63 (10 d; AU)  | DMSO            | 97.4 $\pm$ 6.8         |
|                                       | 100 nM EHDPP    | 84.7 $\pm$ 26.7        |
|                                       | 1,000 nM EHDPP  | 69.1 $\pm$ 15.9        |
|                                       | 10,000 nM EHDPP | 63.8 $\pm$ 11.4        |
| Average intensity of CD71 (10 d; AU)  | DMSO            | 100.8 $\pm$ 15.1       |
|                                       | 100 nM EHDPP    | 67.5 $\pm$ 4.0         |
|                                       | 1,000 nM EHDPP  | 55.4 $\pm$ 16.1        |
|                                       | 10,000 nM EHDPP | 51.4 $\pm$ 11.1        |
| Average intensity of HLA-G (10 d; AU) | DMSO            | 105.7 $\pm$ 12.7       |
|                                       | 100 nM EHDPP    | 94.1 $\pm$ 22.2        |
|                                       | 1,000 nM EHDPP  | 75.0 $\pm$ 16.9        |
|                                       | 10,000 nM EHDPP | 68.7 $\pm$ 12.7        |
| Concentration of hCG (mIU/mL)         | DMSO            | 10,188.3 $\pm$ 611.3   |
|                                       | 100 nM EHDPP    | 10,780.0 $\pm$ 305.6   |
|                                       | 1,000 nM EHDPP  | 8,456.3 $\pm$ 203.8    |
|                                       | 10,000 nM EHDPP | 7,946.9 $\pm$ 101.9    |
| Concentration of E2 (pg/mL)           | DMSO            | 24,585.7 $\pm$ 245.9   |
|                                       | 100 nM EHDPP    | 22,864.7 $\pm$ 2,704.4 |
|                                       | 1,000 nM EHDPP  | 19,422.7 $\pm$ 1,966.9 |
|                                       | 10,000 nM EHDPP | 17,701.7 $\pm$ 2,950.3 |

AU, arbitrary units; TP63, tumor protein 63; CD71, transferrin receptor; HLA-G, human leucocyte antigen protein-G; hCG, human chorionic gonadotropin; E2, estradiol

**Table S10.** Numeric data for Fig 3C (oxygen consumption rate; pmol/min)

| Dose           | Time (min)         | Numeric data (means $\pm$ SDs) | Dose               | Time (min) | Numeric data (means $\pm$ SDs) |
|----------------|--------------------|--------------------------------|--------------------|------------|--------------------------------|
| DMSO           | 1.40               | 615.06 $\pm$ 132.10            | EHDPP 100 nM       | 1.40       | 420.45 $\pm$ 119.32            |
|                | 9.97               | 588.07 $\pm$ 149.15            |                    | 9.97       | 401.99 $\pm$ 105.11            |
|                | 18.55              | 582.39 $\pm$ 153.41            |                    | 18.55      | 393.47 $\pm$ 98.01             |
|                | 27.21              | 394.89 $\pm$ 123.58            |                    | 27.21      | 295.45 $\pm$ 80.97             |
|                | 35.78              | 306.82 $\pm$ 98.01             |                    | 35.78      | 248.58 $\pm$ 85.23             |
|                | 44.31              | 257.10 $\pm$ 86.65             |                    | 44.31      | 207.39 $\pm$ 66.76             |
|                | 52.99              | 640.63 $\pm$ 83.81             |                    | 52.99      | 549.72 $\pm$ 150.57            |
|                | 61.55              | 602.27 $\pm$ 98.01             |                    | 61.55      | 480.11 $\pm$ 180.40            |
|                | 70.12              | 627.84 $\pm$ 132.10            |                    | 70.12      | 453.13 $\pm$ 149.15            |
|                | 78.80              | 197.44 $\pm$ 89.49             |                    | 78.80      | 176.14 $\pm$ 39.77             |
|                | 87.39              | 130.68 $\pm$ 36.93             |                    | 87.39      | 132.10 $\pm$ 36.93             |
| 95.93          | 123.58 $\pm$ 22.73 | 95.93                          | 126.42 $\pm$ 39.77 |            |                                |
| EHDPP 1,000 nM | 1.40               | 278.41 $\pm$ 82.39             | EHDPP 10,000 nM    | 1.40       | 262.78 $\pm$ 38.35             |
|                | 9.97               | 264.20 $\pm$ 78.13             |                    | 9.97       | 264.20 $\pm$ 45.45             |
|                | 18.55              | 257.10 $\pm$ 79.55             |                    | 18.55      | 258.52 $\pm$ 49.72             |
|                | 27.21              | 184.66 $\pm$ 61.08             |                    | 27.21      | 213.07 $\pm$ 39.77             |
|                | 35.78              | 139.20 $\pm$ 58.24             |                    | 35.78      | 178.98 $\pm$ 22.73             |
|                | 44.31              | 122.16 $\pm$ 42.61             |                    | 44.31      | 153.41 $\pm$ 24.15             |
|                | 52.99              | 356.53 $\pm$ 133.64            |                    | 52.99      | 365.06 $\pm$ 88.07             |
|                | 61.55              | 338.07 $\pm$ 153.41            |                    | 61.55      | 318.18 $\pm$ 69.06             |
|                | 70.12              | 321.02 $\pm$ 154.83            |                    | 70.12      | 296.88 $\pm$ 62.50             |
|                | 78.80              | 142.05 $\pm$ 8.52              |                    | 78.80      | 125.00 $\pm$ 39.77             |
|                | 87.39              | 93.75 $\pm$ 7.10               |                    | 87.39      | 90.91 $\pm$ 8.52               |
| 95.93          | 79.55 $\pm$ 2.84   | 95.93                          | 78.13 $\pm$ 5.68   |            |                                |

**Table S11.** Numeric data for Fig 3Q (means  $\pm$  SDs)

| Experiment                | Strain of organoids | Group | Numeric data (AU) |
|---------------------------|---------------------|-------|-------------------|
| Average intensity of Ki67 | 1#                  | DMSO  | 459.5 $\pm$ 41.2  |
|                           |                     | EHDPP | 354.4 $\pm$ 16.0  |
|                           | 2#                  | DMSO  | 383.5 $\pm$ 24.7  |
|                           |                     | EHDPP | 287.9 $\pm$ 12.3  |
|                           | 3#                  | DMSO  | 388.5 $\pm$ 42.8  |
|                           |                     | EHDPP | 282.4 $\pm$ 14.5  |
|                           | 4#                  | DMSO  | 402.2 $\pm$ 12.6  |
|                           |                     | EHDPP | 332.7 $\pm$ 24.7  |
|                           | 5#                  | DMSO  | 349.7 $\pm$ 25.9  |
|                           |                     | EHDPP | 281.8 $\pm$ 14.0  |

AU, arbitrary units

**Table S12.** Numeric data for Fig 4C, 4D, 4E

| Experiment                                       | Dose                                       | Numeric data       |       |       |
|--------------------------------------------------|--------------------------------------------|--------------------|-------|-------|
|                                                  |                                            | 1#                 | 2#    | 3#    |
| Gray value of p-Akt (Ser473;<br>Intden/Area, AU) | DMSO                                       | 153.1              | 149.7 | 150.5 |
|                                                  | 100 nM EHDPP                               | 142.7              | 141.9 | 147.8 |
|                                                  | 1,000 nM EHDPP                             | 136.9              | 144.5 | 142.2 |
|                                                  | 10,000 nM EHDPP                            | 142.7              | 140.2 | 147.2 |
|                                                  | Background                                 | 128.6              | 128.9 | 136.4 |
| Gray value of Akt (Intden/Area; AU)              | DMSO                                       | 201.2              | 201.8 | 209.5 |
|                                                  | 100 nM EHDPP                               | 196.0              | 202.9 | 207.2 |
|                                                  | 1,000 nM EHDPP                             | 190.0              | 192.0 | 210.0 |
|                                                  | 10,000 nM EHDPP                            | 194.7              | 206.9 | 219.0 |
|                                                  | Background                                 | 123.3              | 125.1 | 122.5 |
| Gray value of p-IGF1R (Intden/Area;<br>AU)       | DMSO                                       | 194.1              | 205.0 | 211.1 |
|                                                  | 100 nM EHDPP                               | 177.8              | 178.1 | 180.0 |
|                                                  | 1,000 nM EHDPP                             | 168.5              | 169.5 | 163.6 |
|                                                  | 10,000 nM EHDPP                            | 174.3              | 172.1 | 167.2 |
|                                                  | Background                                 | 141.5              | 144.8 | 131.5 |
| Gray value of IGF1R (Intden/Area;<br>AU)         | DMSO                                       | 211.6              | 202.8 | 202.4 |
|                                                  | 100 nM EHDPP                               | 205.0              | 209.3 | 194.2 |
|                                                  | 1,000 nM EHDPP                             | 206.8              | 200.8 | 183.8 |
|                                                  | 10,000 nM EHDPP                            | 200.3              | 224.6 | 217.6 |
|                                                  | Background                                 | 144.5              | 155.9 | 158.7 |
| EHDPP (ng/mL; means $\pm$ SDs)                   | HA-GFP transfection (1,000 nM<br>EHDPP)    | 0.418 $\pm$ 0.034  |       |       |
|                                                  | HA-IGF1R transfection (1,000 nM<br>EHDPP)  | 1.162 $\pm$ 0.384  |       |       |
|                                                  | HA-GFP transfection (10,000 nM<br>EHDPP)   | 3.177 $\pm$ 0.062  |       |       |
|                                                  | HA-IGF1R transfection (10,000<br>nM EHDPP) | 10.166 $\pm$ 5.433 |       |       |

AU, arbitrary units

**Table S13.** Numeric data for Fig 4F (% inhibition)

| Chemical | Dose      | Numeric data (means<br>± SDs) |
|----------|-----------|-------------------------------|
| EHDPP    | 0.1 nM    | 116.4 ± 8.5%                  |
|          | 1 nM      | 120.3 ± 4.2%                  |
|          | 10 nM     | 95.6 ± 5.0%                   |
|          | 100 nM    | 70.2 ± 7.7%                   |
|          | 1,000 nM  | 50.1 ± 11.1%                  |
|          | 10,000 nM | 10.5 ± 3.5%                   |
|          | 0.001 nM  | 108.5 ± 5.2%                  |
| OSI-906  | 0.01 nM   | 102.4 ± 14.2%                 |
|          | 0.1 nM    | 76.1 ± 5.3%                   |
|          | 1 nM      | 62.3 ± 4.2%                   |
|          | 10 nM     | 50.1 ± 6.3%                   |
|          | 100 nM    | 15.7 ± 0.4%                   |

**Table S14.** Numeric data for Fig 5D, 5E, 5J, 5L, 5M

| Experiments                                          | Dose            | Numeric data (means<br>± SDs) |
|------------------------------------------------------|-----------------|-------------------------------|
| Average intensity of<br>Cdx2 (E7.5; AU)              | Control         | 343.8 ± 58.4                  |
|                                                      | 10 mg/kg EHDPP  | 240.7 ± 75.64                 |
| Average intensity of<br>Ki67 (E7.5; AU)              | Control         | 572.6 ± 40.3                  |
|                                                      | 10 mg/kg EHDPP  | 503.9 ± 40.1                  |
| Body weight (g)                                      | Control         | 1.495 ± 0.105                 |
|                                                      | 0.4 mg/kg EHDPP | 1.490 ± 0.145                 |
|                                                      | 2 mg/kg EHDPP   | 1.429 ± 0.142                 |
|                                                      | 10 mg/kg EHDPP  | 1.401 ± 0.146                 |
| Implanted embryonic<br>number (Total (Mean<br>± SD)) | Control         | 156 (15.6 ± 1.58)             |
|                                                      | 0.4 mg/kg EHDPP | 152 (15.2 ± 1.99)             |
|                                                      | 2 mg/kg EHDPP   | 142 (14.2 ± 2.10)             |
|                                                      | 10 mg/kg EHDPP  | 137 (13.7 ± 1.77)             |
| Surviving embryonic<br>number (Total (Mean<br>± SD)) | Control         | 152 (15.2 ± 1.87)             |
|                                                      | 0.4 mg/kg EHDPP | 143 (14.3 ± 1.70)             |
|                                                      | 2 mg/kg EHDPP   | 128 (12.8 ± 2.62)             |
|                                                      | 10 mg/kg EHDPP  | 123 (12.3 ± 2.54)             |

AU, arbitrary units; Cdx2, caudal-type homeobox 2

**Table S15.** Numeric data for Fig 5K (means  $\pm$  SDs)

| Dose            | Time (min) | Blood glucose (mmol/L) |
|-----------------|------------|------------------------|
| Control         | 0          | 2.46 $\pm$ 0.70        |
|                 | 15         | 11.54 $\pm$ 2.77       |
|                 | 30         | 14.83 $\pm$ 2.57       |
|                 | 60         | 12.04 $\pm$ 3.02       |
|                 | 90         | 6.82 $\pm$ 3.18        |
| 0.4 mg/kg EHDPP | 0          | 2.77 $\pm$ 1.03        |
|                 | 15         | 12.29 $\pm$ 1.15       |
|                 | 30         | 13.60 $\pm$ 2.29       |
|                 | 60         | 12.09 $\pm$ 3.24       |
|                 | 90         | 8.97 $\pm$ 3.72        |
| 2 mg/kg EHDPP   | 0          | 1.93 $\pm$ 0.95        |
|                 | 15         | 9.22 $\pm$ 3.55        |
|                 | 30         | 11.93 $\pm$ 4.19       |
|                 | 60         | 11.98 $\pm$ 5.06       |
|                 | 90         | 8.24 $\pm$ 3.94        |
| 10 mg/kg EHDPP  | 0          | 2.07 $\pm$ 0.53        |
|                 | 15         | 13.04 $\pm$ 1.12       |
|                 | 30         | 14.19 $\pm$ 2.21       |
|                 | 60         | 15.25 $\pm$ 1.93       |
|                 | 90         | 11.73 $\pm$ 2.91       |

**Table S16.** Numeric data for Fig S1D, S1E, S2A, S2B, S2F (means  $\pm$  SDs), and S2D

| Experiments                                    | Group               | Numeric data       |       |       |
|------------------------------------------------|---------------------|--------------------|-------|-------|
| Average intensity of Ki67 (AU)                 | Previous digestion  | 478.3 $\pm$ 29.2   |       |       |
|                                                | Optimized digestion | 406.6 $\pm$ 28.7   |       |       |
| Average intensity of Ki67 (AU)                 | Previous TOM        | 347.7 $\pm$ 13.9   |       |       |
|                                                | Optimized TOM       | 406.8 $\pm$ 13.4   |       |       |
| Average intensity of Sytox Green (2 d; AU)     | DMSO                | 1579.1 $\pm$ 41.2  |       |       |
|                                                | 100 nM EHDPP        | 1637.7 $\pm$ 175.3 |       |       |
|                                                | 1,000 nM EHDPP      | 1701.5 $\pm$ 44.0  |       |       |
|                                                | 10,000 nM EHDPP     | 1642.9 $\pm$ 43.7  |       |       |
| Average intensity of Sytox Green (2 d; AU)     | DMSO                | 1582.4 $\pm$ 38.4  |       |       |
|                                                | 100 nM EHDPP        | 1617.3 $\pm$ 52.7  |       |       |
|                                                | 1,000 nM EHDPP      | 1621.6 $\pm$ 21.1  |       |       |
|                                                | 10,000 nM EHDPP     | 1621.0 $\pm$ 21.9  |       |       |
| Gray value of PD (Intden/Area; AU)             |                     | 1#                 | 2#    | 3#    |
|                                                | DMSO                | 189.5              | 152.9 | 148.4 |
|                                                | 100 nM EHDPP        | 170.2              | 152.6 | 146.3 |
|                                                | 1,000 nM EHDPP      | 161.6              | 146.8 | 145.8 |
|                                                | 10,000 nM EHDPP     | 160.0              | 148.0 | 145.6 |
|                                                | Background          | 137.4              | 134.6 | 137.1 |
| Gray value of $\beta$ -actin (Intden/Area; AU) |                     | 1#                 | 2#    | 3#    |
|                                                | DMSO                | 225.1              | 227.0 | 214.3 |
|                                                | 100 nM EHDPP        | 224.6              | 226.8 | 206.3 |
|                                                | 1,000 nM EHDPP      | 219.7              | 228.1 | 205.7 |
|                                                | 10,000 nM EHDPP     | 222.6              | 224.5 | 212.4 |
|                                                | Background          | 158.7              | 153.7 | 151.6 |
| Average intensity of CD71 (2 d; AU)            | Control (DMSO)      | 138.6 $\pm$ 5.5    |       |       |
|                                                | EHDPP (10, 000 nM)  | 141.4 $\pm$ 20.8   |       |       |

TOM, trophoblast organoid medium; AU, arbitrary units; PD, pyruvate dehydrogenase complex; CD71, transferrin receptor

**Table S17.** Numeric data for Fig S3A, S3B, S3D, S3E, S3G, S3H, S3I, S3J, S3K (mean  $\pm$  SDs)

| Experiments                                 | Dose               | Numeric data     |
|---------------------------------------------|--------------------|------------------|
| Relative expression of IGF1 (RNA level; RU) | DMSO               | 1.00 $\pm$ 0.20  |
|                                             | 100 nM EHDPP       | 0.98 $\pm$ 0.12  |
|                                             | 1,000 nM EHDPP     | 0.86 $\pm$ 0.19  |
|                                             | 10,000 nM EHDPP    | 0.91 $\pm$ 0.22  |
| Relative expression of IGF2 (RNA level; RU) | DMSO               | 1.00 $\pm$ 0.33  |
|                                             | 100 nM EHDPP       | 1.84 $\pm$ 0.40  |
|                                             | 1,000 nM EHDPP     | 2.11 $\pm$ 0.24  |
|                                             | 10,000 nM EHDPP    | 1.47 $\pm$ 0.21  |
| Average Intensity of Ki67 (2 d; AU)         | Control (DMSO)     | 204.6 $\pm$ 12.3 |
|                                             | EHDPP (10, 000 nM) | 69.6 $\pm$ 32.7  |
| Average Intensity of TP63 (2 d; AU)         | Control (DMSO)     | 113.7 $\pm$ 12.5 |
|                                             | EHDPP (10, 000 nM) | 44.3 $\pm$ 15.9  |
| Average Intensity of CD71 (2 d; AU)         | Control (DMSO)     | 126.1 $\pm$ 5.0  |
|                                             | EHDPP (10, 000 nM) | 122.3 $\pm$ 15.1 |
| Average Intensity of Ki67 (10 d; AU)        | Control (DMSO)     | 273.5 $\pm$ 10.9 |
|                                             | EHDPP (10, 000 nM) | 60.1 $\pm$ 30.1  |
| Average Intensity of TP63 (10 d; AU)        | Control (DMSO)     | 142.6 $\pm$ 7.13 |
|                                             | EHDPP (10, 000 nM) | 81.3 $\pm$ 21.4  |
| Average Intensity of CD71 (10 d; AU)        | Control (DMSO)     | 132.3 $\pm$ 11.9 |
|                                             | EHDPP (10, 000 nM) | 62.2 $\pm$ 17.2  |
| Average Intensity of HLA- G (10 d; AU)      | Control (DMSO)     | 62.2 $\pm$ 17.2  |
|                                             | EHDPP (10, 000 nM) | 41.6 $\pm$ 10.7  |

IGF1, insulin-like growth factor 1; IGF2, insulin-like growth factor 2; TP63, tumor protein 63; AU, arbitrary units; RU, relative unit; CD71, transferrin receptor; HLA-G, human leucocyte antigen protein-G

**Table S18.** Numeric data for Fig S4B, S4C, S4D, S4E, S4G, S4H

| Experiments                                                                    | Dose            | Numeric data   |       |       |
|--------------------------------------------------------------------------------|-----------------|----------------|-------|-------|
| Average Intensity of TPBPA<br>(mean $\pm$ SDs; AU)                             | Control         | 39.9 $\pm$ 6.0 |       |       |
|                                                                                | 10 mg/kg EHDPP  | 35.2 $\pm$ 2.8 |       |       |
| Average Intensity of TFAP2C<br>(mean $\pm$ SDs; AU)                            | Control         | 48.2 $\pm$ 8.2 |       |       |
|                                                                                | 10 mg/kg EHDPP  | 42.4 $\pm$ 3.4 |       |       |
| Average Intensity of HAND1<br>(mean $\pm$ SDs; AU)                             | Control         | 31.0 $\pm$ 4.3 |       |       |
|                                                                                | 10 mg/kg EHDPP  | 21.7 $\pm$ 6.8 |       |       |
| Placenta p-IGF1R (Gray value;<br>Intden/Area; AU)                              |                 | 1#             | 2#    | 3#    |
|                                                                                | Control         | 159.2          | 139.9 | 168.8 |
|                                                                                | 0.4 mg/kg EHDPP | 148.4          | 130.5 | 160.8 |
|                                                                                | 2 mg/kg EHDPP   | 138.2          | 130.1 | 160.5 |
|                                                                                | 10 mg/kg EHDPP  | 145.8          | 132.9 | 159.6 |
|                                                                                | Background      | 108.6          | 120.4 | 147.9 |
| Placenta IGF1R (Gray value;<br>Intden/Area; AU)                                |                 | 1#             | 2#    | 3#    |
|                                                                                | Control         | 184.6          | 137.7 | 183.8 |
|                                                                                | 0.4 mg/kg EHDPP | 179.8          | 138.7 | 205.9 |
|                                                                                | 2 mg/kg EHDPP   | 207.9          | 173.6 | 179.3 |
|                                                                                | 10 mg/kg EHDPP  | 184.4          | 158.2 | 193.5 |
|                                                                                | Background      | 97.6           | 104.2 | 161.9 |
| Placenta PD (Gray value;<br>Intden/Area; AU)                                   |                 | 1#             | 2#    | 3#    |
|                                                                                | Control         | 198.9          | 184.6 | 212.6 |
|                                                                                | 0.4 mg/kg EHDPP | 188.6          | 173.9 | 177.7 |
|                                                                                | 2 mg/kg EHDPP   | 175.0          | 154.4 | 192.5 |
|                                                                                | 10 mg/kg EHDPP  | 169.1          | 153.0 | 189.0 |
|                                                                                | Background      | 138.0          | 126.8 | 129.1 |
| Placenta $\beta$ -actin (Gray value,<br>with PD; Intden/Area; AU)              |                 | 1#             | 2#    | 3#    |
|                                                                                | Control         | 200.0          | 224.5 | 228.9 |
|                                                                                | 0.4 mg/kg EHDPP | 188.6          | 223.0 | 225.9 |
|                                                                                | 2 mg/kg EHDPP   | 192.1          | 218.7 | 221.3 |
|                                                                                | 10 mg/kg EHDPP  | 191.5          | 224.6 | 223.1 |
|                                                                                | Background      | 127.5          | 113.3 | 160.9 |
| Placenta cytochrome C (Gray<br>value; Intden/Area; AU)                         |                 | 1#             | 2#    | 3#    |
|                                                                                | Control         | 204.7          | 145.6 | 178.1 |
|                                                                                | 0.4 mg/kg EHDPP | 193.9          | 139.9 | 176.3 |
|                                                                                | 2 mg/kg EHDPP   | 171.8          | 144.2 | 175.2 |
|                                                                                | 10 mg/kg EHDPP  | 169.0          | 135.9 | 174.9 |
|                                                                                | Background      | 141.8          | 125.8 | 163.8 |
| Placenta $\beta$ -actin (Gray value,<br>with cytochrome C;<br>Intden/Area; AU) |                 | 1#             | 2#    | 3#    |
|                                                                                | Control         | 197.6          | 225.6 | 226.9 |
|                                                                                | 0.4 mg/kg EHDPP | 196.8          | 223.0 | 225.1 |
|                                                                                | 2 mg/kg EHDPP   | 195.3          | 226.7 | 223.0 |
|                                                                                | 10 mg/kg EHDPP  | 191.0          | 228.0 | 222.2 |
|                                                                                | Background      | 136.0          | 152.8 | 164.1 |

TPBPA, trophoblast-specific protein  $\alpha$ ; AU, arbitrary units; TFAP2C, transcription factor AP-2 $\gamma$ ; HAND1, crest derivatives-expressed protein 1; p-IGF1R, phosphorylated-IGF1R; IGF1R, insulin-like growth factor 1 receptor; PD, pyruvate dehydrogenase complex



## Sequence of HA-GFP

gacattgatt attgactagt tattaatagt aatcaattac ggggtcatta gttcatagcc catatatgga gttccgcgtt acataactta  
cggtaaatgg cccgcctggc tgaccgcca acgacccccg ccattgacg tcaataatga cgtatgttcc catagtaacg  
ccaataggga cttccattg acgtcaatgg gtggagtatt tacggtaaac tgcccacttg gcagtacatc aagtgtatca  
tatgccaagt acgcccccta ttgacgtcaa tgacggtaaa tggccccctt ggcattatgc ccagtacatg acctatggg  
actttctac ttggcagtac atctacgtat tagtcatgc tattaccatg gtgatgcggt tttggcagta catcaatggg  
cgtggatagc ggtttgactc acggggattt ccaagtctcc accccattga cgtcaatggg agtttgtttt ggcacaaaa  
tcaacgggac ttccaaaaa gtcgtaacaa ctccgcccc ttgacgcaaa tgggcggtag gcgtgtacgg tgggaggtct  
atataagcag agctctctgg ctaactagag aaccactgc ttactggctt atcgaaatta atacgactca ctatagggag  
accaagctg gctagcatgt acccatacga cgtaccagat tacgctagca agggagaaga actctttact ggtgtgtcc  
caattctggt tgagctggat ggtgatgtga atggccacaa atctctgtg tctggtgaag gtgaaggaga tgcaactat  
ggaaagctga ctctgaagtt cattgtaca acaggaaagc tgccagtgc ttggccaact ctggtgacca cctgactta  
tgggttcaa tgttcagca ggtaccctga ccacatgaag cagcatgact tctttaaate tgcaatgcca gaaggttatg  
ttcaggagag gacaatcttc ttaaggatg atggaaatta taagacaagg gcagaagtga agtttgaagg tgatactg  
gttaacagaa ttgagctgaa aggcattgat ttaaggaag atggaaacat tctgggtcac aagctggagt acaactataa  
ttctcacaat gtttacatta tggcagataa gcagaagaat ggaattaagg ttaattcaa gattagacac aacattgagg  
atggatctgt ccaactggca gaccattacc agcagaacac ccctattggt gatggcccag ttctctccc agataatcac  
tatctccgca ctaactctgc tctgtccaaa gaccctaag agaaaagaga ccacatggtc ctctggagt ttgtgacagc  
agcaggaatt actctgggaa tggatgagct gtacaaggga tccaaggaca acaccgtgcc cctgaagctg atgcacctgc  
tggccaacgg cgagttccac tctggcgagc agctgggaga gaccctggga atgagcagag ccgcatcaa caagcacatc  
cagacactga gagactgggg agtggacgtg ttaccctgc ctggcaaggg ctacagcctg cctgagccta tccagctgtc  
gaacgccaag cagatcctgg gacagctgga tggcggaagc gtggccctgc tgctgtgat cgactccacc aatcagtacc  
tgctggacag aatcgagag ctgaagtccg gcgacgctg catcgccgag taccagcagg ctggcagagg aggcagagga  
cggaaagtgt tcagccatt cggagccaac ctgtacctgt ccatgttctg gagactggag cagggacctg ctgctgcat  
cggactgagt ctggtgatc gaatcgtgat ggccgaggtg ctgagaaagc tgggagccga caaggtgaga gtgaagtggc  
ctaatgacct gtacctccag gaccgcaagc tggctggcat cctggtggag ctgacaggca agacaggcga tgccctcag  
atcgtgatc gagccggaat caacatggcc atgagaagag tggaggagag cgtggtgaac cagggctgga tcacctgca  
ggaggctggc atcaacctgg accggaacac cctggccgcc atgctgatca gagagctgag agccgctctg gagctgttcg  
agcaggaggg actggctcct tactgagca gatgggagaa gctggacaac ttcatcaaca gacctgtgaa gctgatc  
ggcgacaagg aaatctcgg catctccaga ggaatcgaca agcagggagc tctgctctg gagcaggacg gaatcatca  
gccctggatg ggcggagaaa tctccctgag aagcgagag aaggcttacc ctacgatgt accggattac gcataggcgg  
cctaagtta aaccgtgat cagcctgac tgtgcctct agttgccagc catctgttgt ttgccctec cccgtgcctt  
cctgacctt ggaaggtgcc actccactg tctttcta ataaatgag gaaattgcat cgcattgtct gagtaggtgt  
cattctattc tggggggtgg ggtggggcag gacagcaagg gggaggattg ggaagacaat agcaggcatg ctggggatgc  
ggtgggctct atggcttctg aggcggaaag aaccagctgg ggctctaggg ggtatccca cgcgccctgt agcggcgc  
taagcggcgg ggtgtggtg gttacgcgca gcgtgaccgc tacacttgc agcgcctag cgccccctcc ttctgcttc  
ttcccttct ttctgccac gttccggc ttccccgc aagctctaaa tggggggctc ctttaggtt tccgatttag  
tgcttacgg cacctcgacc caaaaaact tgattaggtt gatggtcac gtatgggccc atgcacctga tagacggtt  
ttgcccttt gacgtggag tccactgtt ttaatagtg actctgttc caactggaa caaactcaa ccctatctc gtctattctt  
ttgattata agggatttt cegatttcgg cctattggtt aaaaatgag ctgatttaac aaaaattaa cgcgaattaa ttctgtggaa  
tgtgtgcag ttaggggtgt gaaagtcccc aggctccca gcaggcagaa gtatgcaaag catgcatctc aattagtcag  
caaccaggtg tggaaagtcc ccaggctccc cagcaggcag aagtatgcaa agcatgcatc tcaattagtc agcaaccata  
gtcccgcce taactccgc catcccgcc ctaactccgc ccagttccgc ccattctccg cccatggct gactaatttt

ttttattat gcagaggccg aggccgcctc tgcctctgag ctattccaga agtagtgagg aggtttttt ggaggcctag  
gcttttcaa aaagctccc ggagcttcta taccatttt cggatctgat caagagacag gatgaggatc gtttcgatg  
attgaacaag atggattgca cgcaggttct cgggccgctt ggggtggagag gctattcggc tatgactggg cacaacagac  
aatcggctgc tctgatgccc cctgttccc gctgtcagcg caggggcgcc cggttcttt tctcaagacc gacctgtccc  
gtgccctgaa tgaactgcag gacgaggcag cgcggctatc gtggctggcc acgacggggc ttctttgcgc agctgtgctc  
gacgttga ctaagcggg aaggactgg ctgctattgg gcgaagtgcc ggggcaggat ctctgtcat ctacctgc  
tctgccgag aaagtatcca tcatggctga tgcaatgcgg cggctgcata cgttgatcc ggctacctgc ccattcgacc  
accaagcgaa acatcgatc gagcgagcac gtactcggat ggaagccggt cttgtcgatc aggatgatct ggacgaagag  
catcaggggc tccgccagc cgaactgtc gccaggctca aggcgcgcac gcccgaccg gaggatctcg tctgacca  
tggcgatgcc tcttggcca atatcatggt ggaaaatggc cgttttctg gattcatcga ctgtggccgg ctgggtgtgg  
cggaccgcta tccagacata gcgttggcta cccgtgatat tctgaagag cttggcggcg aatgggctga ccgcttctc  
gtctttacg gtatgccgc tcccattcg cagcgcacg cttctatcg cttcttgac gagttctct gagcgggact  
ctggggctc aatgaccga ccaagcgac ccaacctgc catcacgaga ttctgattcc accgccctct tctatgaaag  
gttgggctc ggaatcgtt tccgggacgc cggctggatg atctccagc gcggggatct catgctggag ttctcggc  
acccaactt gttattgca gttataatg gttacaata aagcaatagc atcacaatt tcacaataa agcattttt tcaactgcat  
ctagttgtg ttttccaaa ctcatcaatg tatctatca tctctgata cctcgacct ctactagag cttggcgtaa tcatggtcat  
agcttttcc tctgtgaaat tttatccc tacaattcc acacaacata cgagccggaa gcataaagt taaagcctgg  
ggtgcctaat gactgagta actcacatta attcgttgc gtcactgcc cgtttccag tccggaaacc tctctgcca  
gctgactaa tgaatcggc aacgcgcggg gagagccggt ttgcgtattg ggcgctctc cgttctctc ctactgact  
cgtcgcgctc ggtcgttgg ctgcggcgag cgtatcagc tactcaaaag gcgtaatac ggttatccac agaactcagg  
gataacgcag gaaagaacat gtgagcaaaa ggccagcaaa agccaggaa ccgtaaaaag gccgcgttgc tggcgtttt  
ccataggctc cccccctg acgagcatc caaaaatcga cgtcaagtc agaggtggcg aaaccgaca ggactataa  
gataaccgac gtttcccc ggaagctcc tctgctcctc tctgttccg acctgccgc ttaccggata cctgtccc  
tttccccct cgggaagcgt ggcgcttct catagctcac gctgtaggta tctcagttc gtgtaggtc tctgctcaa  
gctgggctgt gtgcacgaac cccccgtca gcccgaccgc tgcgcttat ccgtaacta tctcttgag tccaaccgg  
taagacaga ctatcggca ctggcagcag ccactgtaa caggattagc agagcgaggt atgtaggcgg tgctacagag  
ttctgaaat ggtggcctaa ctacggctac actagaagaa cagtattgg tatctgcct ctgctgaagc cagttacct  
cggaaaaaga gttgtagct cttgatccg caaacaacc acctggtga gcggtgggtt tttgttgc aagcagcaga  
ttacgcgcag aaaaaagga tctcaagaag atctttgat cttttacg gggctgacg ctactggaa cgaaaacta  
cgttaaggga tttgtgcat gagattaca aaaaggatct taccatgat cttttaa taaaatgaa gttttaa atctaaagt  
atatatgagt aaactggc tgcagttac caatgctaa tcaatgaggc acctatctc gcgatctgc tttctgtc atccatgtt  
gcctgactc cctcgtgta gataactag atacgggagg gcttaccatc tggccccagt gctgcaatga taccgcgaga  
cccagctca ccggctccag atttatcagc aataaccag ccagccggaa gggccgagc cagaagtgt cctgcaact  
tatccgctc catccagctc attaattgt gccgggaagc tagagtaagt agttcggc ttaatagtt gcgcaactg  
gttgcattg ctacaggcat cgtggtgta cgtcgtctg ttggtatggt ttactcagc tccggtccc aacgatcaag  
gcgagttaca tgatcccca tttgtgcaa aaaagcgggt agctctctc gtcctccat cgttgcaga agtaagttgg  
ccgactgtt atactcatg gttatggcag cactgcaaa ttctctact gcatgcat ccgtaaatg cttttctg  
actggtgagt actcaacaa gtcattctga gaatagtga tgcggcgacc gactgtctc tggccggcgt caatacggga  
taataccgc ccacatagca gaactttaa agtgcctc attgaaaa gttctcggg gcgaaaactc tcaagatct  
taccgctgt gagatccagt tcatgtaac ccactcgtc acccaactga tctcagcat ctttactt caccagcgtt  
tctgggtgag caaaaacagg aaggcaaat gccgcaaaa agggaataag ggcgacacgg aatgttga tactcact  
cttctttt caatattat gaagcattt tccaggttat tctctatga gcggatacat attgaaatg attagaaaa ataaacaat  
aggggttccg cgcacattc cccgaaaagt gccactgac gtcgacggat cgggagatct cccgatccc tatggtgcac

tctcagtaca atctgctctgatgccgcata gttaagccag tatctgctcc ctgcttgtgt gttggaggtc getgagtagt  
gcgcgagcaa aatttaagct acaacaagge aaggettgc cgacaattgc atgaagaatc tgcttagggt taggcgttt  
gcgctgcttc gcgatgtac ggccagatat acgcgtt

## References

- Carignan CC, Mínguez-Alarcón L, Butt CM, Williams PL, Meeker JD, Stapleton HM, et al. 2017. Urinary concentrations of organophosphate flame retardant metabolites and pregnancy outcomes among women undergoing *in vitro* fertilization. *Environ Health Perspect* 125(8):087018, PMID: 288858831, <https://doi.org/10.1289/EHP1021>.
- Funk SP, Duffin L, He Y, McMullen C, Sun C, Utting N, et al. 2019. Assessment of impacts of diphenyl phosphate on groundwater and near-surface environments: Sorption and toxicity. *J Contam Hydrol* 221:50-57, PMID:30642690, <https://doi.org/10.1016/j.jconhyd.2019.01.002>.
- Gao D, Yang J, Bekele TG, Zhao S, Zhao H, Li J, et al. 2020. Organophosphate esters in human serum in Bohai Bay, North China. *Environ Sci Pollut Res* 27(3):2721-2729, PMID: 31836969, <https://doi.org/10.1007/s11356-019-07204-5>.
- He M, Jin K, Qiu S, Liao X, Zheng X, Chen Z, et al. 2021. The associations between organophosphate esters and urinary incontinence in the general us population. *Environ Sci Pollut Res*, online ahead of print, PMID: 34523086, <https://doi.org/10.1007/s11356-021-14153-5>
- Hou M, Shi Y, Jin Q, Cai Y. 2020. Organophosphate esters and their metabolites in paired human whole blood, serum, and urine as biomarkers of exposure. *Environ Int* 39:105698, PMID: 32278199, <https://doi.org/10.1016/j.envint.2020.105698>.
- Liu R, Mabury SA. 2019. Organophosphite antioxidants in indoor dust represent an indirect source of organophosphate esters. *Environ Sci Technol* 53(4):1805-1811, PMID: 30657667, <http://doi.org/10.1021/acs.est.8b05545>.
- Sheridan MA, Fernando RC, Gardner L, Holinshead MS, Burton GJ, Moffett A, et al. 2020. Establishment and differentiation of long-term trophoblast organoid cultures from the human placenta. *Nat Protoc* 15(10):3441-3463, PMID: 32908314, <https://doi.org/10.1038/s41596-020-0381-x>.
- Stapleton HM, Klosterhaus S, Keller A, Ferguson PL, van Bergen S, Cooper E, et al. 2011. Identification of flame retardants in polyurethane foam collected from baby products. *Environ Sci Technol* 45(12):5323-31, PMID: 21591615, <http://doi.org/10.1021/es2007462>.
- Wang L, Jia Y, Kang Q, Song W, Hu J. 2020. Nontarget discovery of 11 aryl organophosphate triesters in house dust using high-resolution mass spectrometry. *Environ Sci Technol* 54(18):11376-11385, PMID: 32830962, <https://doi.org/10.1021/acs.est.0c01970>.
- Wang L, Kang Q, Jia Y, Li X, Hu J. 2021. Identification of three novel chloroalkyl organophosphate triesters in house dust using halogenation-guided nontarget screening combined with suspect. *Environ Sci Technol* 55(4):2482-2490 PMID: 33502167, <https://doi.org/10.1021/acs.est.0c07278>.
